# Supplementary material for: Psychological safety, hierarchy, and other issues in operating room debriefing: reflexive thematic analysis of interviews from the frontline
Source: bioRxiv or medRxiv preprint supplement (doi:10.1101/2022.09.23.22280268), 2023-04-05
Supplement: Supplementary file [file media-2.pdf]

## Appendix 2

### Quality checklist

Braun and Clarke's 15-point checklist of criteria for good thematic analysis (Braun & Clarke, 2022) and our quality self-assessment.

| Criteria                                                                                                                                                         | Our assessment                                                                                                                                                      |
|------------------------------------------------------------------------------------------------------------------------------------------------------------------|---------------------------------------------------------------------------------------------------------------------------------------------------------------------|
| The data have been transcribed to an appropriate level of detail, and the transcripts have been checked against the tapes for 'accuracy'.                        | Transcripts were transcribed in full except for one interview in which recording failed. Participants were given the opportunity to review and correct transcripts. |
| Each data item has been given equal attention in the coding process.                                                                                             | Yes.                                                                                                                                                                |
| Themes have not been generated from a few vivid examples (an anecdotal approach), but instead the coding process has been thorough, inclusive and comprehensive. | Themes were developed from examples across the dataset after thorough review and re-review of data.                                                                 |
| All relevant extracts for all each theme have been collated.                                                                                                     | Collated in Taguette®.                                                                                                                                              |
| Themes have been checked against each other and back to the original data set.                                                                                   | Yes.                                                                                                                                                                |
| Themes are internally coherent, consistent, and distinctive.                                                                                                     | We believe so.                                                                                                                                                      |
| Data have been analysed – interpreted, made sense of – rather than just paraphrased or described.                                                                | We have taken a critical approach in analysis and interpretation.                                                                                                   |
| Analysis and data match each other – the extracts illustrate the analytic claims.                                                                                | Yes.                                                                                                                                                                |
| Analysis tells a convincing and well-organized story about the data and topic.                                                                                   | We believe so.                                                                                                                                                      |
| A good balance between analytic narrative and illustrative extracts is provided.                                                                                 | We believe the balance is about right.                                                                                                                              |
| Enough time has been allocated to complete all phases of the analysis adequately, without rushing a phase or giving it a once-over-lightly.                      | We have reflected and analysed data over a period of about nine months.                                                                                             |
| The assumptions about, and specific approach to, thematic analysis are clearly explicated.                                                                       | Yes (see the methodology section).                                                                                                                                  |
| There is a good fit between what you claim you do, and what you show you have done – i.e., described method and reported analysis are consistent.                | We believe so.                                                                                                                                                      |
| The language and concepts used in the report are consistent with the epistemological position of the analysis.                                                   | We believe so.                                                                                                                                                      |
| The researcher is positioned as active in the research process; themes do not just 'emerge'.                                                                     | Researcher reflexivity is stated in the methodology section, and the researchers have actively developed the themes.                                                |
