# Supplementary material for: Psychological safety, hierarchy, and other issues in operating room debriefing: reflexive thematic analysis of interviews from the frontline
Source: bioRxiv or medRxiv preprint supplement (doi:10.1101/2022.09.23.22280268), 2023-04-05
Supplement: Supplementary file [file media-3.pdf]

## Appendix 3

### Conceptual depth scale

Nelson's 5-point conceptual depth scale (Nelson, 2017) and our quality self-assessment.

| Criteria   | Our assessment                                                                                                                               |
|------------|----------------------------------------------------------------------------------------------------------------------------------------------|
| Range      | A wide range of codes.<br>Data source is quite uniform (interviews of operating room staff).                                                 |
| Complexity | Quite a complex initial coding tree as shown in the figures.                                                                                 |
| Subtlety   | We have taken a rich interpretation of the language used by participants particularly for the themes on psychological safety and leadership. |
| Resonance  | We have engaged extensively with the literature.                                                                                             |
| Validity   | We have not performed interviews with staff from other hospitals to check the 'external' applicability of themes.                            |

Nelson, J. (2017). Using conceptual depth criteria: Addressing the challenge of reaching saturation in qualitative research. *Qualitative Research*, 17(5), 554–570. <https://doi.org/10.1177/1468794116679873>
