# Supplementary material for: Psychological safety, hierarchy, and other issues in operating room debriefing: reflexive thematic analysis of interviews from the frontline
Source: bioRxiv or medRxiv preprint supplement (doi:10.1101/2022.09.23.22280268), 2023-04-05
Supplement: Supplementary file [file media-5.pdf]

## Appendix 5

### Quality reporting guidelines

Standards for Reporting Qualitative Research (O'Brien et al., 2014).

| #  | Topic                                                                                        | Location /explanation               |
|----|----------------------------------------------------------------------------------------------|-------------------------------------|
| 1  | Title                                                                                        | Title "reflexive thematic analysis" |
| 2  | Abstract                                                                                     | Structured abstract                 |
| 3  | Problem formulation                                                                          | Introduction                        |
| 4  | Purpose or research question                                                                 | Introduction last paragraph         |
| 5  | Qualitative approach and research paradigm                                                   | Methodology                         |
| 6  | Researcher characteristics and reflexivity                                                   | Methodology                         |
| 7  | Context                                                                                      | Methodology                         |
| 8  | Sampling strategy                                                                            | Methodology                         |
| 9  | Ethical issues pertaining to human subjects                                                  | Methodology (ethics number)         |
| 10 | Data collection methods                                                                      | Methodology                         |
| 11 | Data collection instruments and technologies                                                 | Methodology                         |
| 12 | Units of study                                                                               | Results first paragraph and Table 1 |
| 13 | Data processing                                                                              | Methodology                         |
| 14 | Data analysis                                                                                | Methodology                         |
| 15 | Techniques to enhance trustworthiness                                                        | Methodology                         |
| 16 | Synthesis and interpretation                                                                 | Results                             |
| 17 | Links to empirical data                                                                      | Results, quotations                 |
| 18 | Integration with prior work, implications, transferability, and contribution(s) to the field | Discussion                          |
| 19 | Limitations                                                                                  | Limitations section of discussion   |
| 20 | Conflicts of interest                                                                        | Title page                          |
| 21 | Funding                                                                                      | Title page                          |

O'Brien, B. C., Harris, I. B., Beckman, T. J., Reed, D. A., & Cook, D. A. (2014). Standards for Reporting Qualitative Research: A Synthesis of Recommendations. *Academic Medicine*, 89(9), 1245-1251.

<https://doi.org/10.1097/ACM.0000000000000388>
