# Supplementary material for: Psychological safety, hierarchy, and other issues in operating room debriefing: reflexive thematic analysis of interviews from the frontline
Source: bioRxiv or medRxiv preprint supplement (doi:10.1101/2022.09.23.22280268), 2023-04-05

Figure S1. Initial themes map.

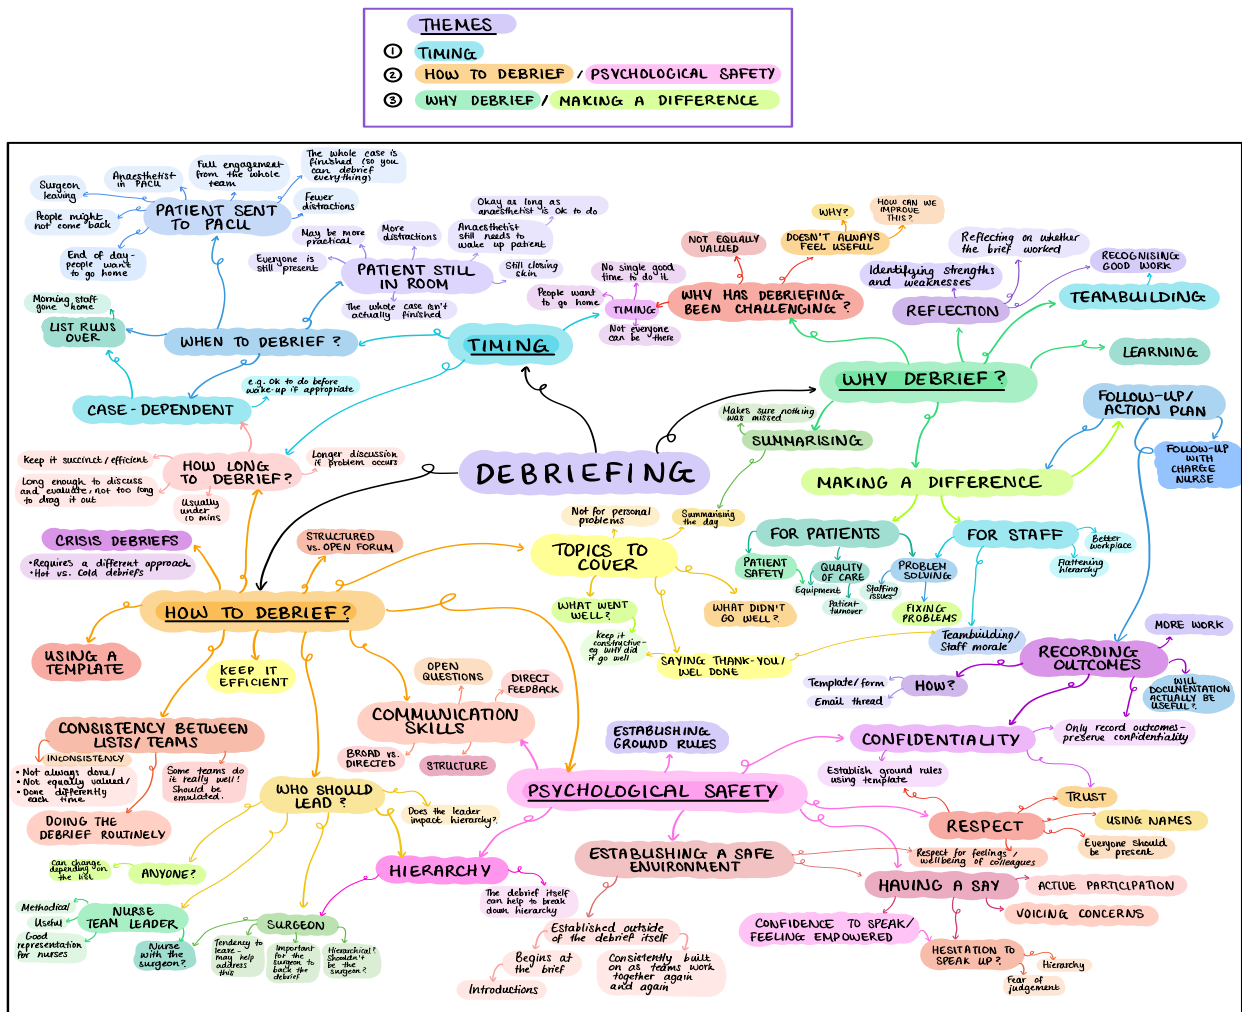

Supplement: Supplementary file [file media-6.pdf]
